# Supplementary material for: Derivation of Multipotent Mesenchymal Precursors from Human Embryonic Stem Cells
Source: PubMed Central journal article supplement (PMC1160574; doi:10.1371/journal.pmed.0020161), 2005-06-28

**DAPI**

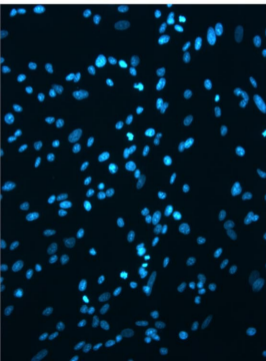

**hNA**

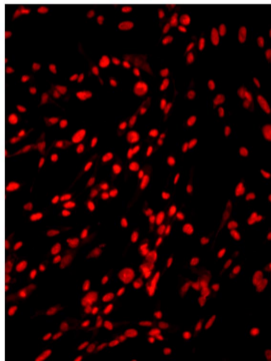

**DAPI/hNA**

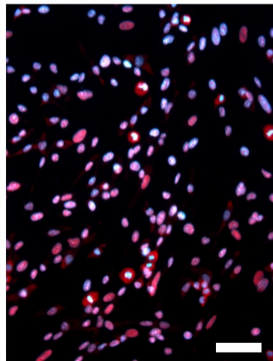

Supplement: pmed.0020161.sg001.pdf [file pmed.0020161.sg001.pdf]
