# Supplementary material for: Derivation of Multipotent Mesenchymal Precursors from Human Embryonic Stem Cells
Source: PubMed Central journal article supplement (PMC1160574; doi:10.1371/journal.pmed.0020161), 2005-06-28

**A**      **untreated**

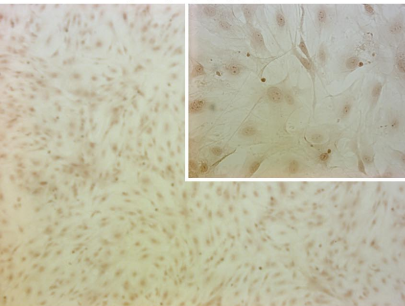

**treated**

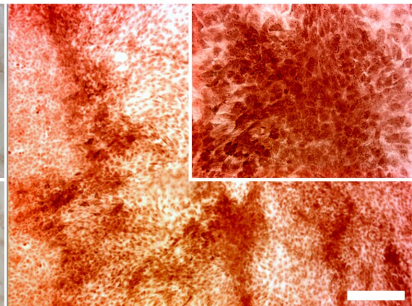

**B**      **day0**

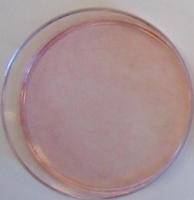

**day7**

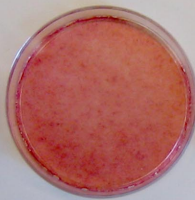

**day14**

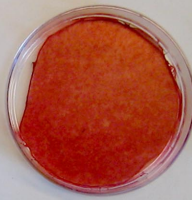

**day19**

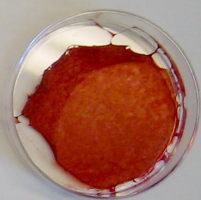

Supplement: pmed.0020161.sg002.pdf [file pmed.0020161.sg002.pdf]
