# Supplementary material for: Derivation of Multipotent Mesenchymal Precursors from Human Embryonic Stem Cells
Source: PubMed Central journal article supplement (PMC1160574; doi:10.1371/journal.pmed.0020161), 2005-06-28
Supplement: pmed.0020161.st001.pdf [file pmed.0020161.st001.pdf]

Barberi et al., Supplementary Table 1

| Name          | orientation | Annealing temp. | Size of amplified fragment | Sequence                        |
|---------------|-------------|-----------------|----------------------------|---------------------------------|
| GAPDH         | sense       | 59              | 342                        | <i>CCCCTTCATTGACCTCAACTACA</i>  |
|               | antisense   | 59              |                            | <i>TTGCTGATGATCTTGAGGCTGT</i>   |
| OCT4          | sense       | 59              | 422                        | <i>ATTTGCCAAGCTCCTGAAGCAG</i>   |
|               | antisense   | 59              |                            | <i>TTGATCGCTTGCCCTTCTGG</i>     |
| NANOG         | sense       | 56              | 378                        | <i>AGTGTGGATCCAGCTTGTCCC</i>    |
|               | antisense   | 56              |                            | <i>TTCTTGCATCTGCTGGAGGC</i>     |
| PPAR $\gamma$ | sense       | 56              | 350                        | <i>CTCCTATTGACCCAGAAAGC</i>     |
|               | antisense   | 56              |                            | <i>GTAGAGCTGAGTCTTCTCAG</i>     |
| COLLAGEN 2    | sense       | 58              | 390                        | <i>ATGATTCGCCTCGGGGCTCC</i>     |
|               | antisense   | 58              |                            | <i>CATTACTGGGAACTGGGCGC</i>     |
| AGGRECAN      | sense       | 56              | 190                        | <i>CACTGTTACCGCCACTTCCC</i>     |
|               | antisense   | 56              |                            | <i>ACCAGCGGAAGTCCCCTTCG</i>     |
| ALP           | sense       | 51              | 454                        | <i>TGGAGCTTCAGAAGCTCAACACCA</i> |
|               | antisense   | 51              |                            | <i>ATCTCGTTGTCTGAGTACCAGTCC</i> |
| BSP           | sense       | 56              | 450                        | <i>AATGAAAACGAAGAAAGCGAAG</i>   |
|               | antisense   | 56              |                            | <i>ATCATAGCCATCGTAGCCTTGT</i>   |
| MyoD          | sense       | 55              | 170                        | <i>GCAGGTGTAACCGTAACC</i>       |
|               | antisense   | 55              |                            | <i>ACGTACAAATTCCTGTAGC</i>      |
| MYOGENIN      | sense       | 55              | 438                        | <i>TAAGGTGTGTAAGAGGAAGTCG</i>   |
|               | antisense   | 55              |                            | <i>CCACAGACACATCTTCCACTGT</i>   |
| MYH-2         | sense       | 52              | 850                        | <i>CTGCTGAAGGAGAGGGAGCT</i>     |
|               | antisense   | 52              |                            | <i>TGATTAGCTGGTCACACCTT</i>     |
